# Supplementary material
Source: MDPI journal article supplement (https://www.mdpi.com/2076-3417/11/12/5689)
Supplement: s1 [file s1]

## Article

# Automatic Actin Filament Quantification and Cell Shape Modeling of Osteoblasts on Charged Ti Surfaces

Martina Gruening <sup>1</sup>, Jonathan E. Dawson <sup>2</sup>, Christian Voelkner <sup>3</sup>, Sven Neuber <sup>4</sup>, Katja Fricke <sup>5</sup>, Ursula van Rienen <sup>2,6</sup>, Sylvia Speller <sup>3,6</sup>, Christiane A. Helm <sup>4</sup> and J. Barbara Nebe <sup>1,6,\*</sup>

<sup>1</sup> Department of Cell Biology, Rostock University Medical Center, 18057 Rostock, Germany; mar-tina.gruening@med.uni-rostock.de

<sup>2</sup> Department of Computer Science and Electrical Engineering, Institute of General Electrical Engineering, University of Rostock, 18059 Rostock, Germany; jonathan.dawson2@uni-rostock.de (J.E.D.); ursula.van-rienen@uni-rostock.de (U.v.R.)

<sup>3</sup> Physics of Surfaces and Interfaces, Institute of Physics, University of Rostock, 18059 Rostock, Germany; christian.voelkner@uni-rostock.de (C.V.); sylvia.speller@uni-rostock.de (S.S.)

<sup>4</sup> Soft Matter and Biophysics, Institute of Physics, University of Greifswald, 17489 Greifswald, Germany; sven.neuber@uni-greifswald.de (S.N.); helm@uni-greifswald.de (C.A.H.)

<sup>5</sup> Leibniz Institute for Plasma Science and Technology e.V. (INP), 17489 Greifswald, Germany; k.fricke@inp-greifswald.de (K.F.)

<sup>6</sup> Interdisciplinary Faculty, University of Rostock, 18059 Rostock, Germany

\* Correspondence: barbara.nebe@med.uni-rostock.de; Tel.: +49-381-494-7771

## Supplementary Material

**Citation:** Gruening, M.; Dawson, J.E.; Voelkner, C.; Neuber, S.; Fricke, K.; van Rienen, U.; Speller, S.; Helm, C.A.; Nebe, J.B. Automatic Actin Filament Quantification and Cell Shape Modeling of Osteoblasts on Charged Ti Surfaces. *Appl. Sci.* **2021**, *11*, 5689. <https://doi.org/10.3390/app11125689>.

Academic Editor: Roger Narayan

Received: 21 April 2021

Accepted: 16 June 2021

Published: 19 June 2021

**Publisher's Note:** MDPI stays neutral with regard to jurisdictional claims in published maps and institutional affiliations.

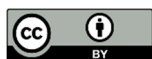

**Copyright:** © 2021 by the authors.

Submitted for possible open access publication under the terms and conditions of the Creative Commons Attribution (CC BY) license (<https://creativecommons.org/licenses/by/4.0/>).

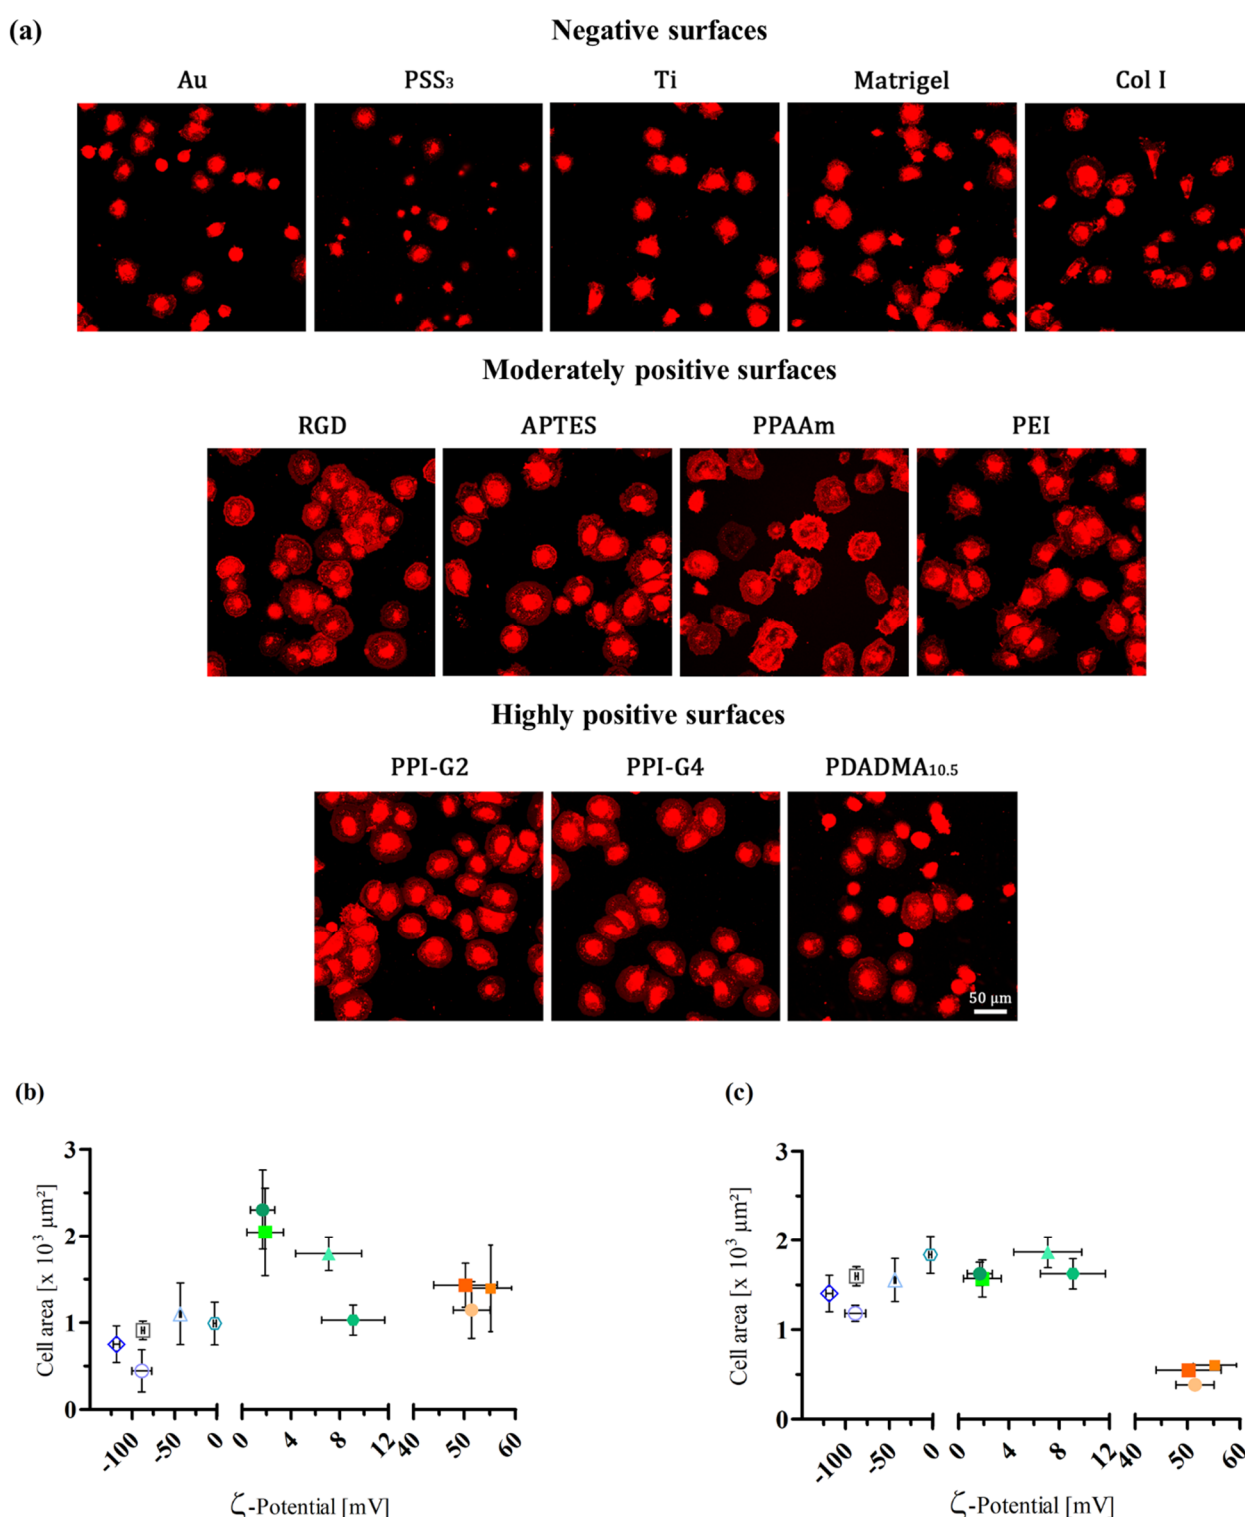

**Figure S1.** Spreading course of MG-63s on modified Ti surfaces dependent on the  $\zeta$ -potential. (a) Microscopic images of PKH26 stained cells after 1 h on negative, moderately, and highly positive surfaces. (b) Cell area after 1 h and (c) after 24 h on charged surfaces. Note that cells on highly positive surfaces exhibit impaired cell spreading. For information on the conducted PKH26 membrane staining, see Gruening et al. 2020 [2], and for surface preparation and characteristics, see Gruening et al. 2020 [1]. Plot: cell areas in mean  $\pm$  SD; surfaces from negative to positive  $\zeta$ -potential: Au (gold), PSS (polystyrene sulfonate), Ti (titanium), Matrigel, Col I (collagen type I), RGD (arginine–glycine–aspartate sequence), APTES (3-aminopropyltriethoxysilane), PPAAm (plasma polymerized allylamine), PEI (polyethylenimine), PPI-G4 (polypropylenimine dendrimer generation 4), PDADMA (polydiallyldimethylammonium chloride), and PPI-G2 (polypropylenimine dendrimer generation 2).

**Table S1.** Cell spreading data of 1 and 24 h dependent on the  $\zeta$ -potential. Shown are  $\zeta$ -potential values in means  $\pm$  SD from Gruening et al. [1], cell area values in mean  $\pm$  SD and circularity in medians with 25th and 75th quartiles in gray. Statistics: Kruskal–Wallis + Dunn's,  $p < 0.05$ , \* significance to Ti and # significance to PPAAm;  $n = 3$  independent experiments.

|      | Surface         | Au     | PSS <sub>3</sub> | Ti        | Matrigel | Col I  | RGD     | APTES  | PAAAm     | PEI    | PPI-G4  | PDADMA <sub>10.3</sub> | PPI-G2  |
|------|-----------------|--------|------------------|-----------|----------|--------|---------|--------|-----------|--------|---------|------------------------|---------|
|      | ζ-Potential [1] | −118.7 | −88.8            | −87.5     | −43.3    | −2.8   | 1.7     | 1.9    | 7.1       | 9.1    | 50.2    | 51.4                   | 55.2    |
|      |                 | ± 4    | ± 12             | ± 2       | ± 1      | ± 1    | ± 1     | ± 1    | ± 3       | ± 3    | ± 6     | ± 4                    | ± 4     |
| 1 h  | Cell area       | 749 #  | 443 #*           | 910 #     | 1099 #   | 990 #  | 2044 #* | 2301#* | 1792 *    | 1028 # | 1428 *  | 1144 #                 | 1392 #* |
|      |                 | ± 212  | ± 241            | ± 104 [2] | ± 354    | ± 246  | ± 507   | ± 458  | ± 195 [2] | ± 172  | ± 253   | ± 325 [2]              | ± 498   |
|      | Circularity     | 0.68 # | 0.73 #*          | 0.69 #    | 0.68 #   | 0.59 * | 0.71 #* | 0.66 # | 0.61 *    | 0.68 # | 0.75 #* | 0.72 #*                | 0.78 #* |
|      |                 | 0.61   | 0.67             | 0.6       | 0.63     | 0.51   | 0.66    | 0.57   | 0.51      | 0.62   | 0.68    | 0.65                   | 0.73    |
|      |                 | 0.75   | 0.78             | 0.74      | 0.73     | 0.67   | 0.77    | 0.73   | 0.69      | 0.73   | 0.79    | 0.76                   | 0.81    |
|      |                 |        |                  |           |          |        |         |        |           |        |         |                        |         |
| 24 h | Cell area [1]   | 1402   | 1181 #           | 1595      | 1553     | 1836   | 1568    | 1623   | 1865      | 1621   | 547 #*  | 383 #*                 | 601 #*  |
|      |                 | ± 202  | ± 90             | ± 108     | ± 241    | ± 210  | ± 207   | ± 131  | ± 175     | ± 169  | ± 45    | ± 42                   | ± 40    |
|      | Circularity     | 0.42   | 0.50             | 0.36      | 0.50     | 0.37   | 0.46    | 0.45   | 0.44      | 0.38   | 0.74 #* | 0.77 #*                | 0.73#*  |
|      |                 | 0.34   | 0.36             | 0.28      | 0.38     | 0.26   | 0.40    | 0.36   | 0.37      | 0.32   | 0.67    | 0.74                   | 0.69    |
|      |                 | 0.61   | 0.57             | 0.45      | 0.65     | 0.50   | 0.64    | 0.66   | 0.54      | 0.49   | 0.77    | 0.81                   | 0.77    |

## References

1. Gruening, M.; Neuber, S.; Nestler, P.; Lehnfeld, J.; Dubs, M.; Fricke, K.; Schnabelrauch, M.; Helm, C. A.; Müller, R.; Staehlke, S.; Nebe, J. B. Enhancement of Intracellular Calcium Ion Mobilization by Moderately but Not Highly Positive Material Surface Charges. *Front. Bioeng. Biotechnol.* **2020**, *8*, 1016. <https://doi.org/10.3389/fbioe.2020.01016>.
2. Gruening, M.; Neuber, S.; Fricke, K.; Helm, C. A.; Nebe, B. Cell-Material Interaction - Spreading Course Correlates with Surface Charge. *Am. J. Biomed. Sci. Res.* **2020**, *9* (9), 4–6. <https://doi.org/10.34297/AJBSR.2020.09.001341>.
